# Supplementary material for: Designing organic room temperature phosphorescence with ultralong lifetime by substituent modification
Source: Royal Society of Chemistry journal article supplement (doi:10.1039/d1tc02169a), 2021-01-01
Supplement: d1tc02169a1.pdf [file d1tc02169a1.pdf]

## Supporting Information

### Designing Organic Room Temperature Phosphorescence with Ultralong Lifetime by Substituent Modification

*Bing Fang, Liming Lai, Mingyu Fan, Meizhen Yin\**

State Key Laboratory of Chemical Resource Engineering, Beijing Laboratory of Biomedical Materials, Beijing University of Chemical Technology, Beijing 100029 (P.R. China).

\*E-mail: [yinmz@mail.buct.edu.cn](mailto:yinmz@mail.buct.edu.cn).

### Experimental Section

**Materials and instruments.** 9H-carbazole, methyl 4-bromobenzoate, potassium carbonate, Pd(t-Bu<sub>3</sub>P)<sub>2</sub>, are purchased from Alfa Aesar Co. and use without further purification. The solvents for synthesis are common commercial grade. <sup>1</sup>H NMR and <sup>13</sup>C NMR spectra are recorded on a Bruker 400 (400 MHz) spectrometer. Fluorescence spectroscopic studies are performed on a fluorescence spectrophotometer (Horiba Jobin Yvon FluoroMax-4 NIR, NJ, USA). UV-vis spectra are obtained on a spectrometer (Cintra 20, GBC, Australia). The percentage distribution of each lifetime component to the total decay curve and photoluminescence quantum yield is recorded using an Edinburgh Instruments FLS-980 and FS-5 fluorospectrophotometer. Powder X-ray diffraction (PXRD) patterns carried by a D/max2500 VB2+/PC X-ray diffractometer (Rigaku) using Cu K $\alpha$  radiation in the 2 $\theta$  range 5-40°. Single crystals of CBM-CH<sub>3</sub> and CBM-OCH<sub>3</sub> were performed at 104 K with a Rigaku X-ray diffractometer using graphite-monochromated Mo K $\alpha$  radiation ( $\lambda$  = 0.71073 Å). The crystallographic information has been deposited with Cambridge Crystallographic Data Centre and signed to CCDC code 1820457 for CBM, 2077531 for CBM-CH<sub>3</sub>, 2077532 for CBM-OCH<sub>3</sub>. The photos are taken by Canon 600D. High performance liquid chromatography

(HPLC) was performed on an Agilent 1260 Infinite HPLC system using a Agilent 5 Prep-C18 column. The running rate was 0.8 mL/min, and running buffer was 100% THF.

## Computational methods

TD-DFT calculations were conducted on Gaussian 09 program. Ground state ( $S_0$ ) geometries of these compounds were directly selected from single crystal structures and were used as molecular models without further optimization. On the basis of this, exciton energies in singlet ( $S_n$ ) and triplet states ( $T_n$ ) were estimated through a TD-DFT method at the TD-B3LYP/6-31+G (d, p) level.<sup>[1]</sup> Kohn-Sham frontier orbital analysis was subsequently performed based on the results of theoretical calculation to elucidate the mechanisms of possible singlet-triplet intersystem crossings, in which the channels from  $S_1$  to  $T_n$  are believed to share part of the same transition orbital compositions.<sup>[2]</sup> All the natural transition orbitals (NTO) analysis were evaluated by Multiwfn program based on TD-DFT results using Gaussian 09 package.<sup>[3]</sup> Spin-orbital coupling matrix elements were investigated by ORCA program (version 4.1) based on the TD-DFT results.<sup>[4-6]</sup> The fraction free volume was calculated through Materials Studio software (version 7.0) from Accelrys Inc.<sup>[7]</sup> All the molecular models are selected from the single crystal structures.

## Synthesis and characterizations

**Synthesis of CBM:** Under nitrogen atmosphere, 9H-carbazole (501 mg), methyl 4-bromobenzoate (645 mg),  $\text{Pd}(\text{t-Bu}_3\text{P})_2$  (10 mg), potassium carbonate (500 mg) were suspend in toluene (10 mL). The toluene solution was allowed to reflux at 110°C for 12

h and then cooled to room temperature. After removing the solvent, the residue was dissolved in dichloromethane and then washed with water. The organic phase was dried over anhydrous  $\text{Na}_2\text{SO}_4$ . The obtained crude product used column chromatography to provide a white powder.  $^1\text{H}$  NMR (400 MHz,  $\text{CDCl}_3$ )  $\delta$  8.29 (d,  $J$  = 8.4 Hz, 2H), 8.15 (d,  $J$  = 7.7 Hz, 2H), 7.69 (d,  $J$  = 8.4 Hz, 2H), 7.45 (dt,  $J$  = 8.2, 7.7 Hz, 4H), 7.32 (t,  $J$  = 7.3 Hz, 2H), 4.00 (s, 3H).  $^{13}\text{C}$  NMR (101 MHz,  $\text{CDCl}_3$ )  $\delta$  166.55 (s), 142.19 (s), 140.41 (s), 131.51 (s), 128.81 (s), 126.44 (d,  $J$  = 23.4 Hz), 123.94 (s), 120.63 (d,  $J$  = 9.6 Hz), 109.89 (s), 52.49 (s). ESI-TOF:  $\text{C}_{20}\text{H}_{15}\text{NO}_2$ ,  $m/z$  calcd for  $[\text{M}+\text{H}]^+$  302.36, found, 312.1199.

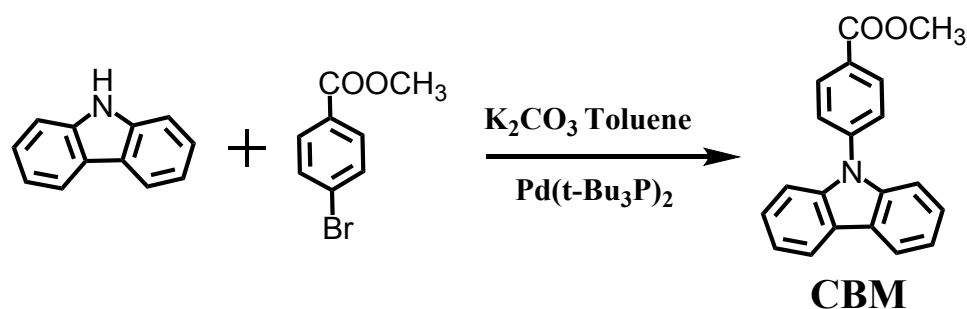

**Scheme S1.** Synthesis route for CBM.

**Synthesis of CBM- $\text{CH}_3$ :** Under nitrogen atmosphere, 9H-carbazole (501 mg), methyl 4-bromo-2-methylbenzoate (687 mg),  $\text{Pd}(\text{t-Bu}_3\text{P})_2$  (10 mg), potassium carbonate (500 mg) were suspend in toluene (10 mL). The toluene solution was allowed to reflux at  $110^\circ\text{C}$  for 12 h and then cooled to room temperature. After removing the solvent, the residue was dissolved in dichloromethane and then washed with water. The organic phase was dried over anhydrous  $\text{Na}_2\text{SO}_4$ . The obtained crude product used column chromatography to provide a white powder.  $^1\text{H}$  NMR (400 MHz,  $\text{CDCl}_3$ )  $\delta$  8.16 (dd,  $J$  = 10.3, 7.7 Hz, 3H), 7.52 – 7.39 (m, 6H), 7.31 (d,  $J$  = 14.6 Hz, 2H), 3.97 (s, 3H), 2.72 (s, 3H).  $^{13}\text{C}$  NMR (101 MHz,  $\text{CDCl}_3$ )  $\delta$  167.51 (s), 142.70 (s), 141.10 (s), 140.48 (s), 132.59 (s), 129.60 (s), 128.28 (s), 126.25 (s), 123.88 (d,  $J$  = 7.9 Hz), 120.53 (d,  $J$  = 2.1 Hz), 109.97 (s), 52.17 (s), 22.11 (s). ESI-TOF:  $\text{C}_{21}\text{H}_{17}\text{NO}_2$ ,  $m/z$  calcd for  $[\text{M}+\text{H}]^+$  316.35, found, 316.1347.

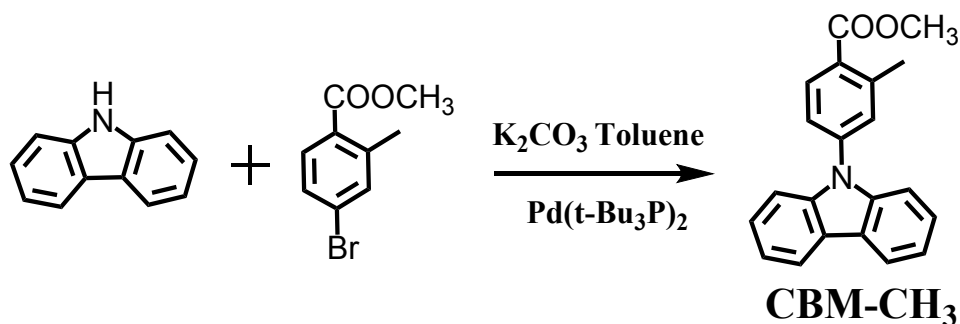

**Scheme S2.** Synthesis route for CBM-CH<sub>3</sub>.

### Synthesis of CBM-OCH<sub>3</sub>:

**Synthesis of CBM-OCH<sub>3</sub>:** Under nitrogen atmosphere, 9H-carbazole (501 mg), methyl 4-bromo-2-methoxybenzoate (703 mg), Pd(t-Bu<sub>3</sub>P)<sub>2</sub> (10 mg), potassium carbonate (500 mg) were suspended in toluene (10 mL). The toluene solution was allowed to reflux at 110°C for 12 h and then cooled to room temperature. After removing the solvent, the residue was dissolved in dichloromethane and then washed with water. The organic phase was dried over anhydrous Na<sub>2</sub>SO<sub>4</sub>. The obtained crude product used column chromatography to provide a white powder. <sup>1</sup>H NMR (400 MHz, CDCl<sub>3</sub>) δ 8.15 (d, J = 7.7 Hz, 2H), 8.06 (d, J = 8.2 Hz, 1H), 7.49 (d, J = 8.2 Hz, 2H), 7.46-7.41 (m, 2H), 7.34-7.30 (m, 2H), 7.25-7.20 (m, 2H), 3.97 (s, 3H), 3.93 (s, 3H). <sup>13</sup>C NMR (101 MHz, CDCl<sub>3</sub>) δ 166.19 (s), 160.60 (s), 142.70 (s), 140.43 (s), 133.38 (s), 126.35 (s), 123.87 (s), 120.61 (d, J = 3.1 Hz), 118.83 (s), 118.42 (s), 110.58 (s), 109.96 (s), 56.48 (s), 52.36 (s). ESI-TOF: C<sub>21</sub>H<sub>17</sub>NO<sub>3</sub>, m/z calcd for [M+H]<sup>+</sup> 332.36, found, 332.1308.

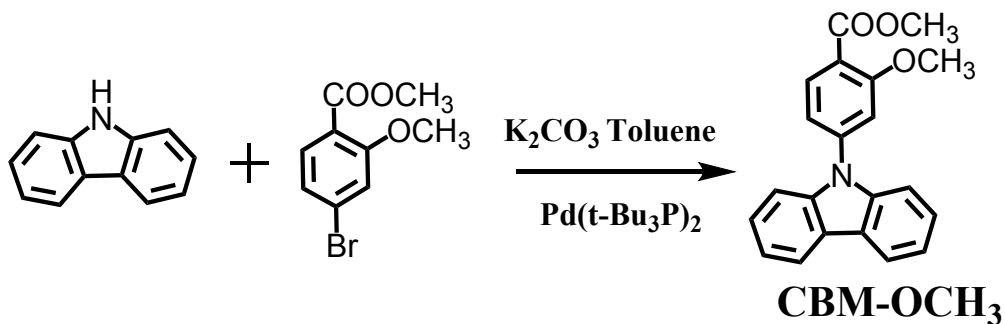

**Scheme S3.** Synthesis route for CBM-OCH<sub>3</sub> compounds.

### Carbazole-based molecule structures reported with RTP properties

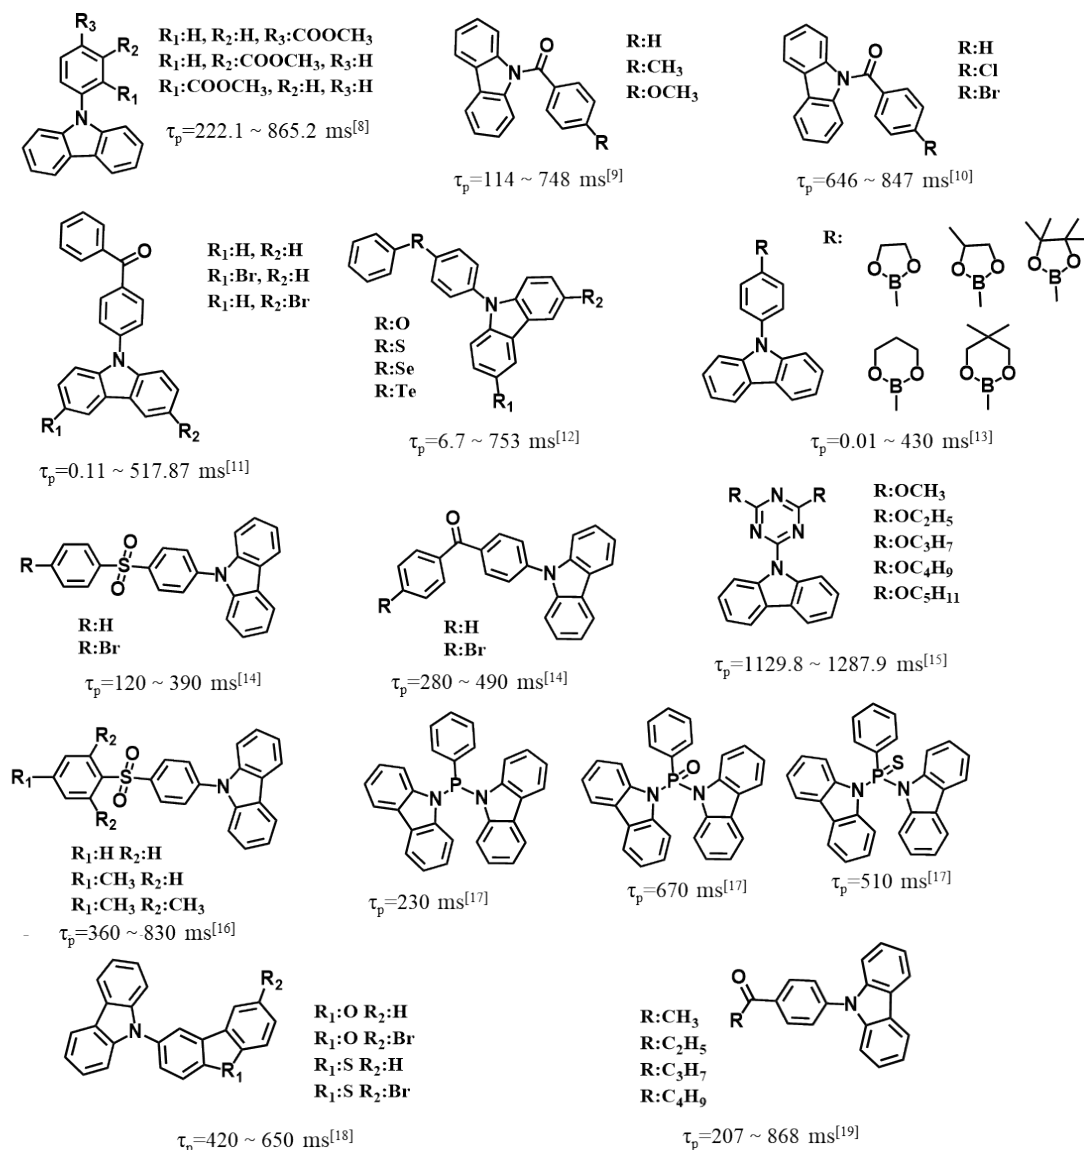

**Fig. S1** Phosphorescence lifetime of the molecules reported with RTP properties.

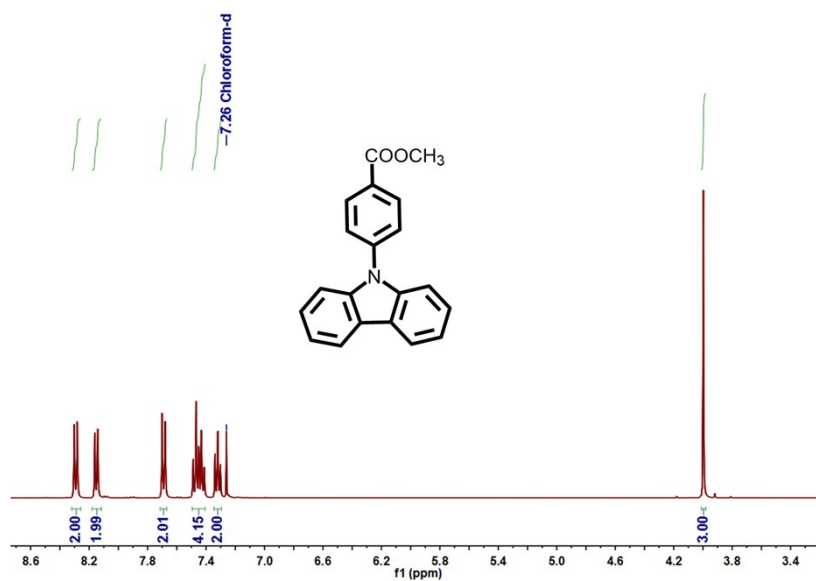

Fig. S2 <sup>1</sup>H NMR spectrum of CBM in CDCl<sub>3</sub>.

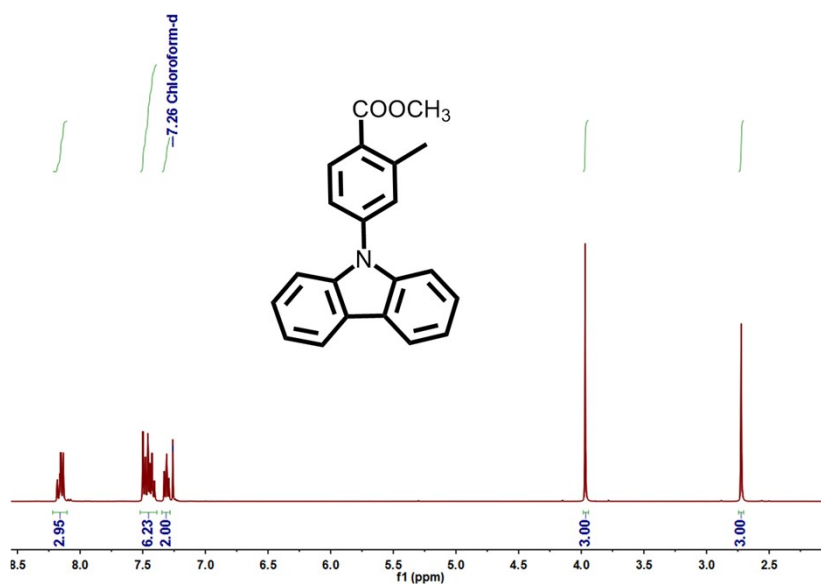

Fig. S3 <sup>1</sup>H NMR spectrum of CBM-CH<sub>3</sub> in CDCl<sub>3</sub>.

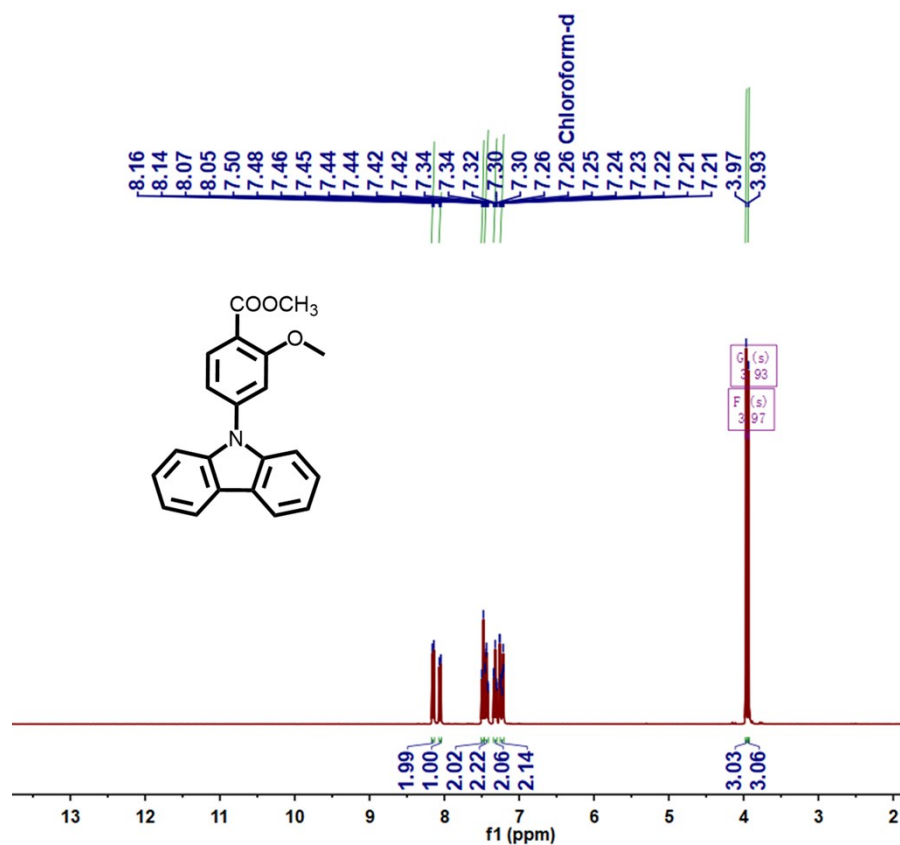

Fig. S4 <sup>1</sup>H NMR spectrum of CBM-OCH<sub>3</sub> in CDCl<sub>3</sub>.

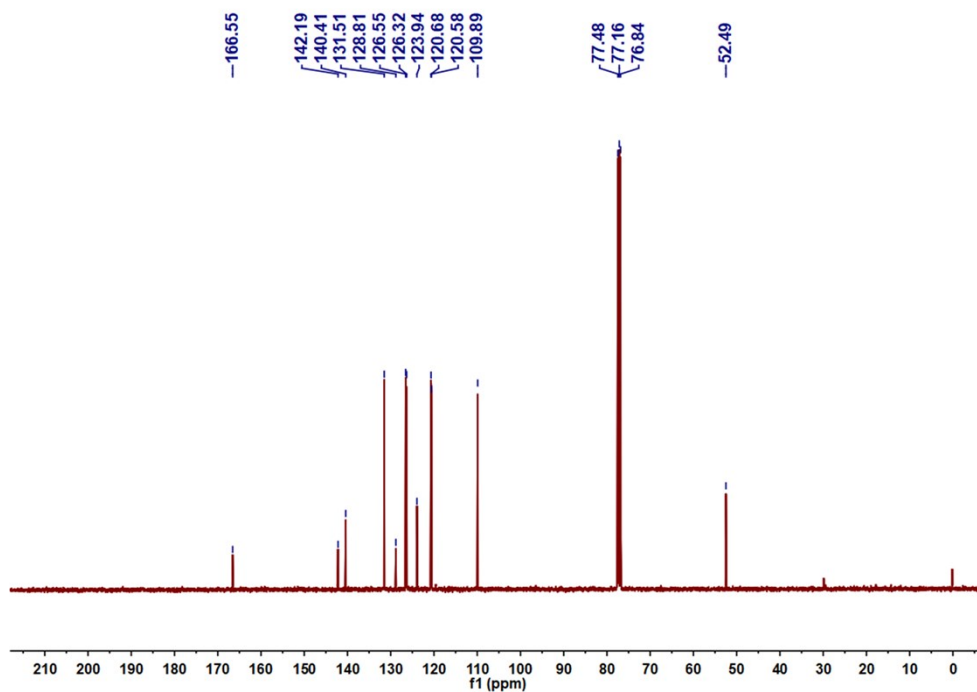

Fig. S5 <sup>13</sup>C NMR spectrum of CBM in CDCl<sub>3</sub>.

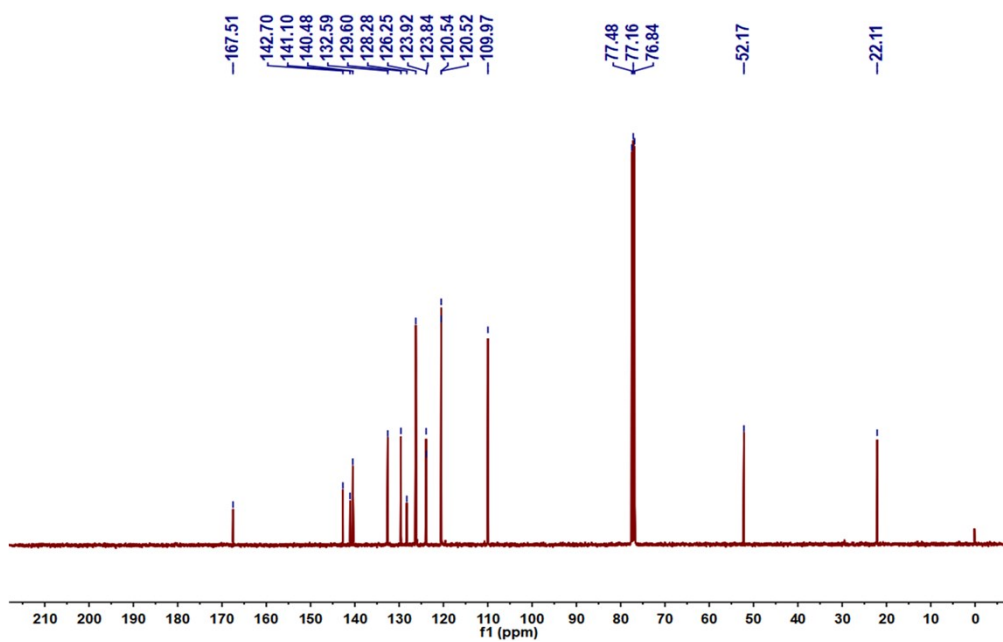

**Fig. S6** <sup>13</sup>C NMR spectrum of CBM-CH<sub>3</sub> in CDCl<sub>3</sub>.

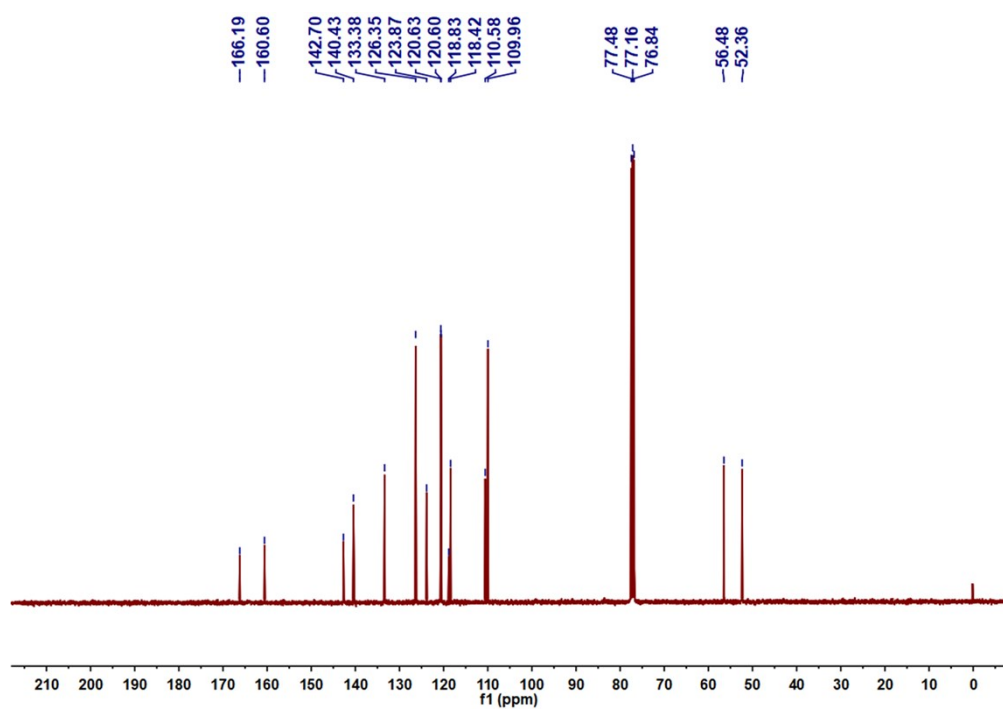

**Fig. S7** <sup>13</sup>C NMR spectrum of CBM-OCH<sub>3</sub> in CDCl<sub>3</sub>.

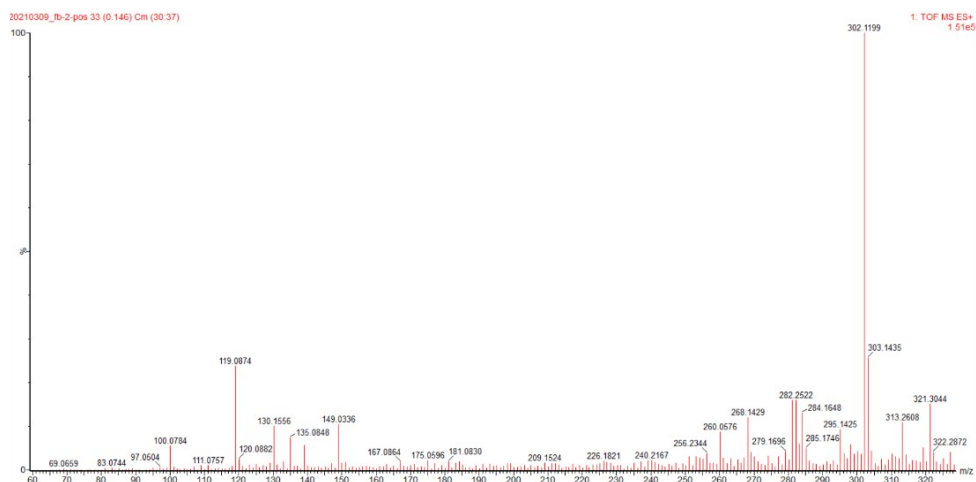

**Fig. S8 ESI-TOF of CBM.**

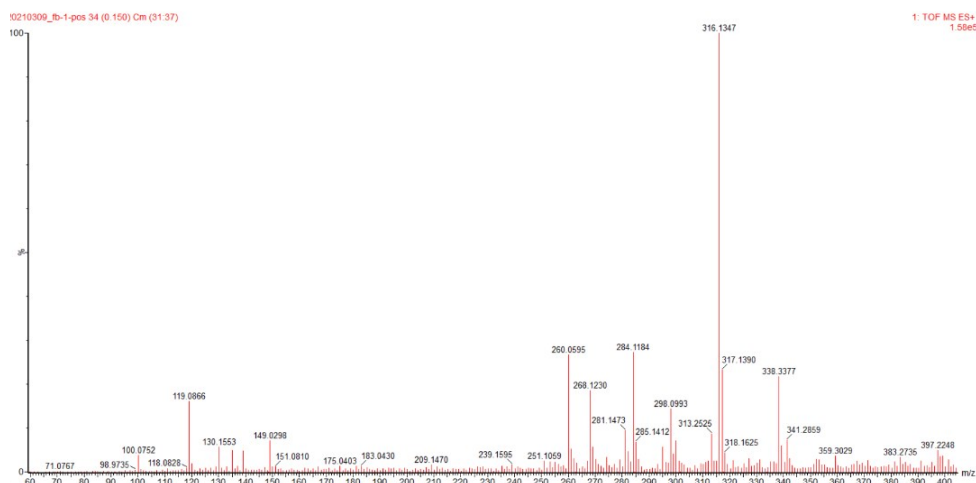

**Fig. S9 ESI-TOF of CBM-CH<sub>3</sub>.**

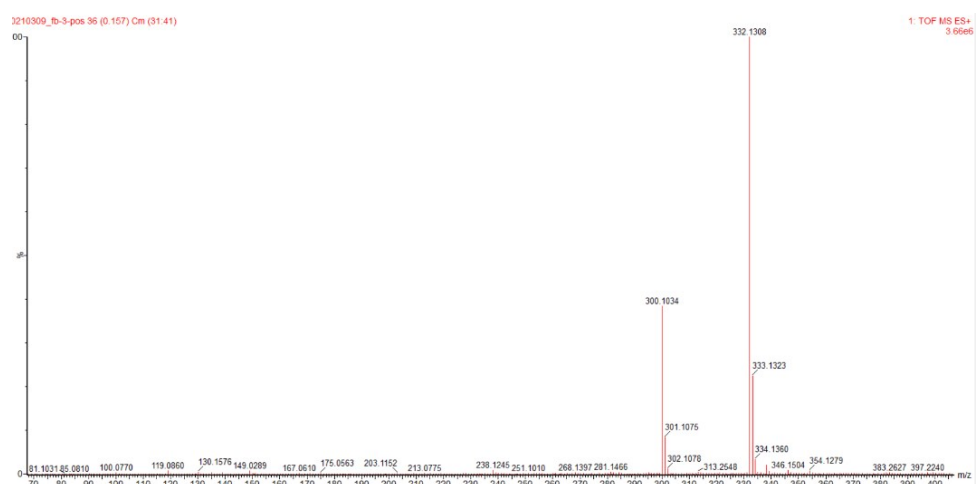

**Fig. S10 ESI-TOF of CBM-OCH<sub>3</sub>.**

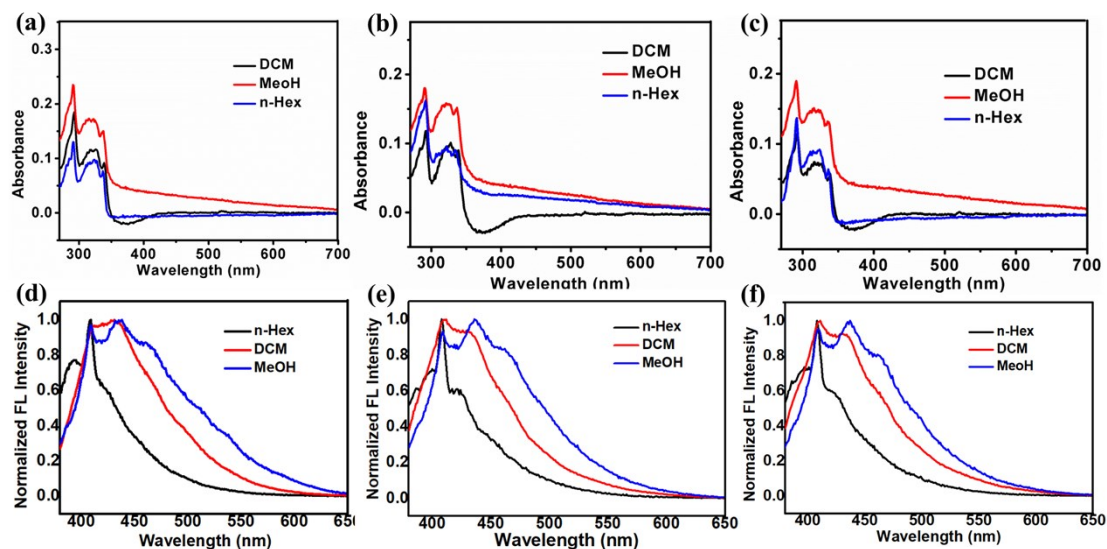

**Fig. S11** (a) UV-vis absorption ( $10^{-5}$  M) and (b) Fluorescence (FL) spectra ( $10^{-5}$  M) of three carbazole-based compounds in DCM solution.

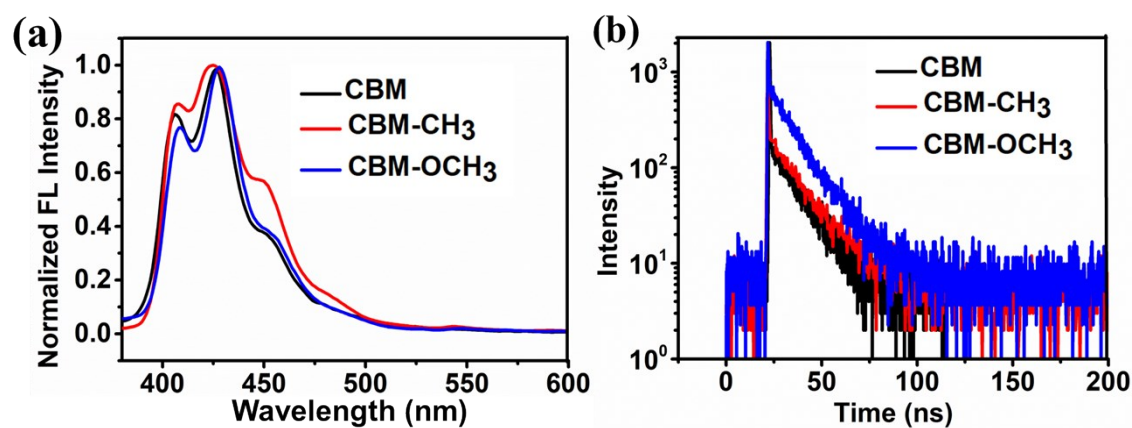

**Fig. S12** (a) Normalized fluorescence (FL) spectra of three crystals excited by 365 nm. (b) Lifetime decay profiles of three crystals phosphorescence bands at 426 nm excited by 365 nm.

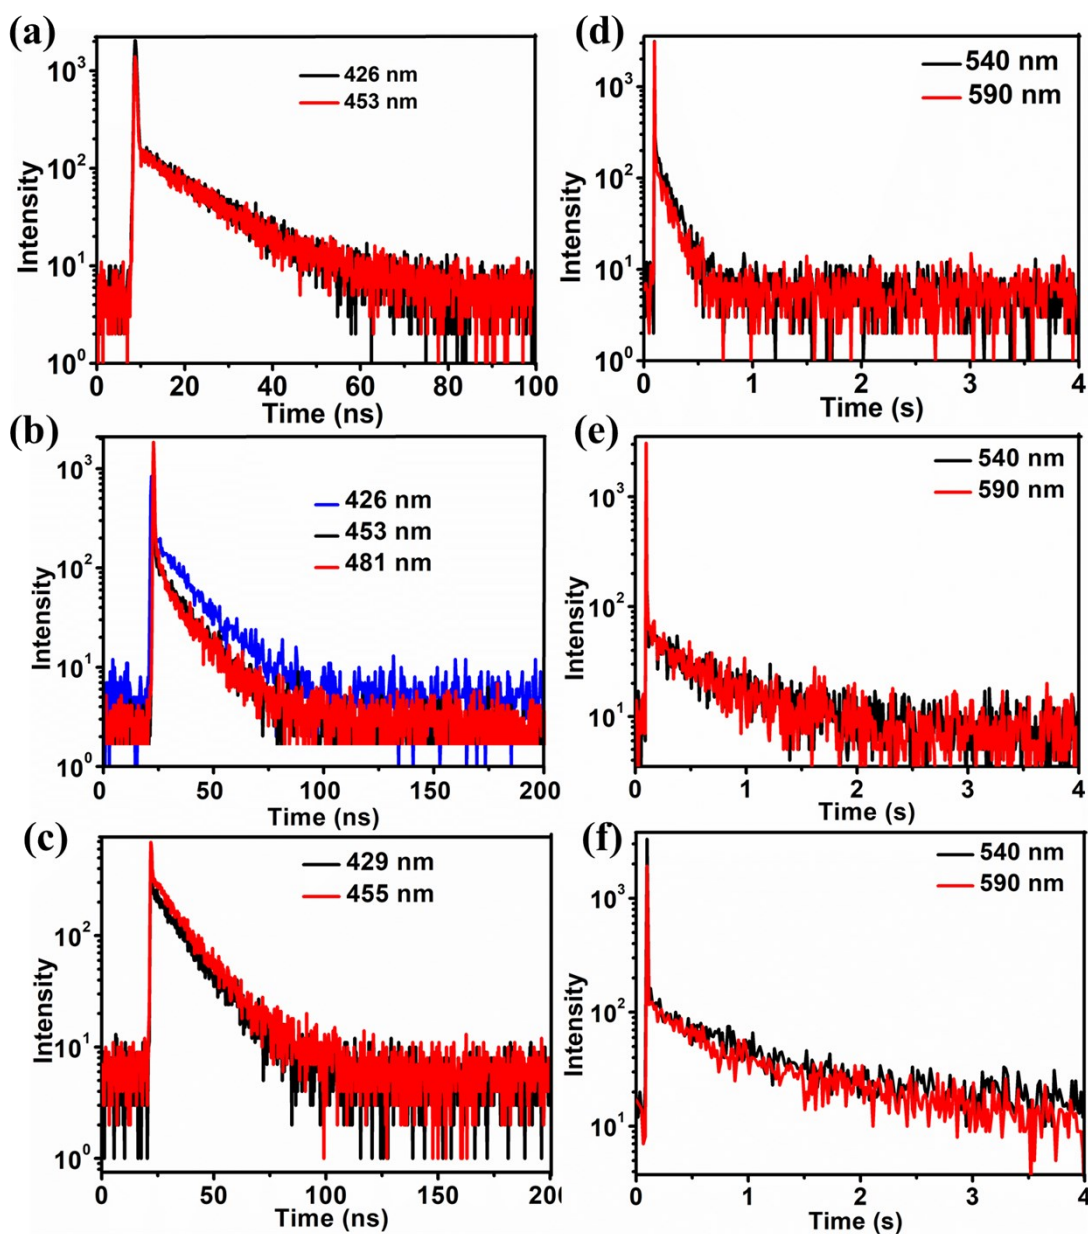

**Fig. S13** Lifetime decay profiles of CBM (a, d), CBM-CH<sub>3</sub> (b, e) and CBM-OCH<sub>3</sub> (c, f) crystals fluorescence and phosphorescence bands excited by 365 nm.

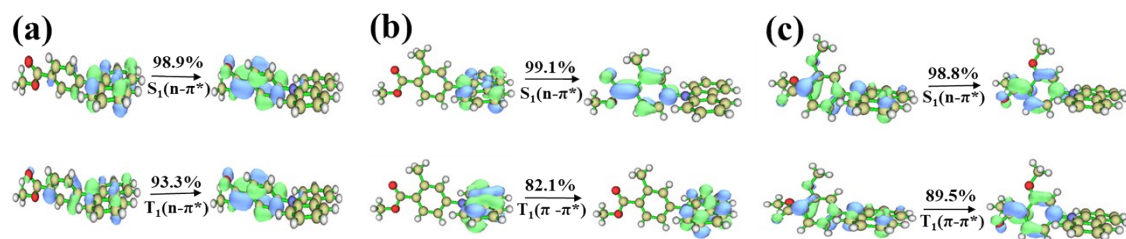

**Fig. S14** Natural transition orbitals (NTOs) for S<sub>1</sub> and T<sub>1</sub> state of (a) CBM, (b) CBM-CH<sub>3</sub>, (c) CBM-OCH<sub>3</sub>.

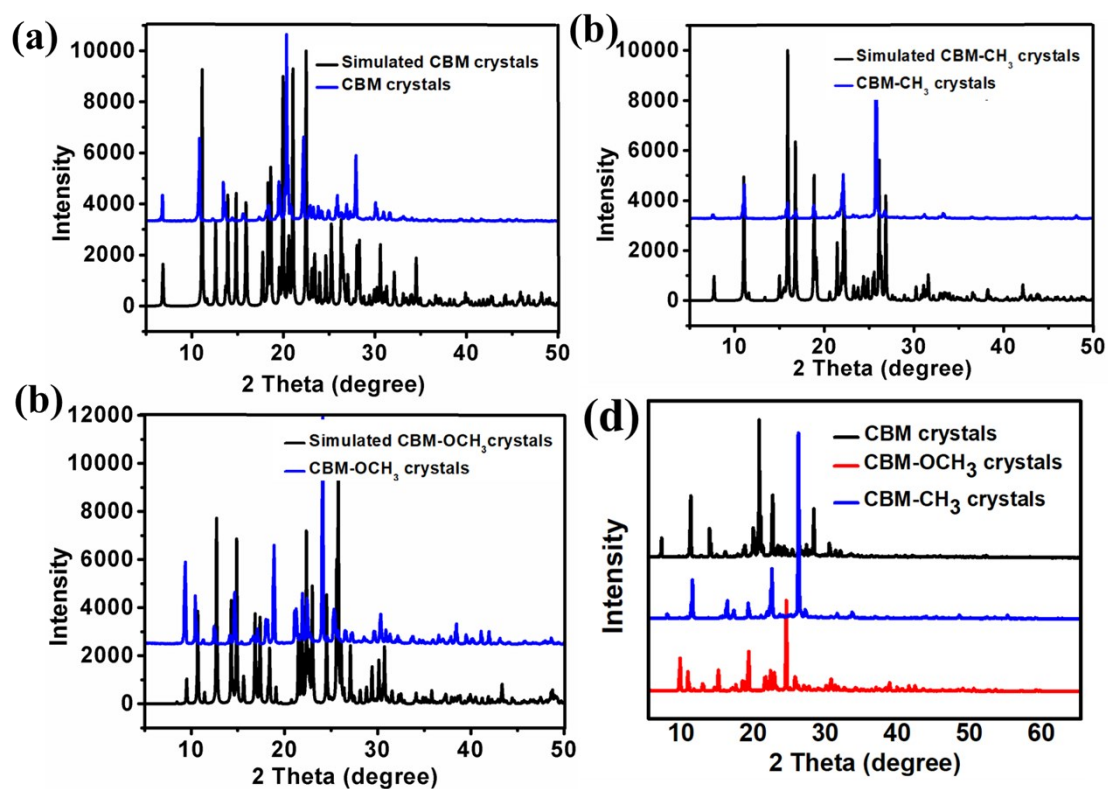

**Fig. S15** Powder XRD pattern of three crystals and simulated pattern from their single crystal structures.

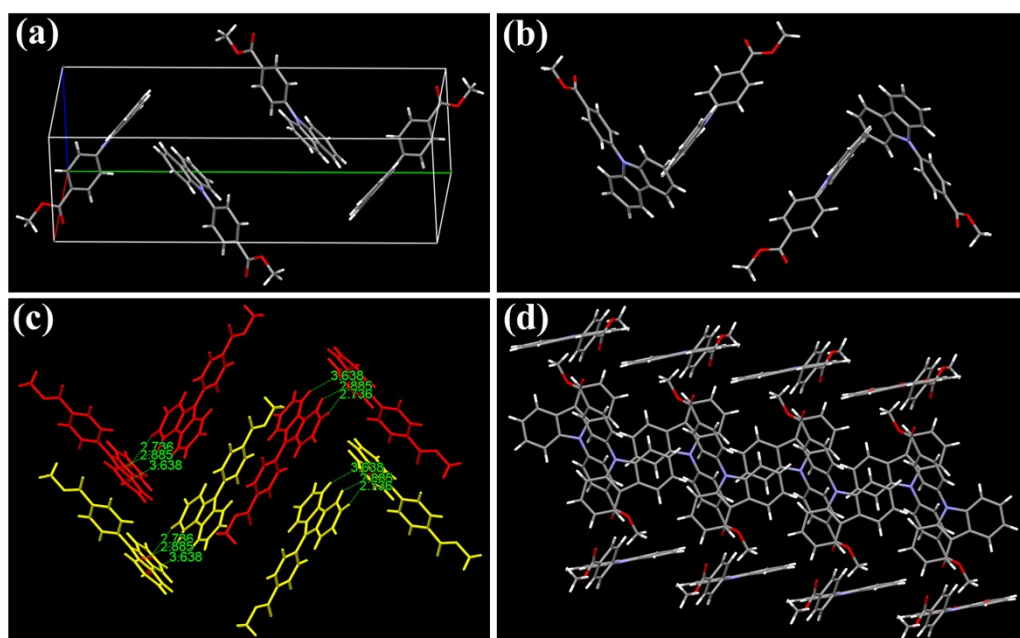

**Fig. S16** Unit cell and intermolecular interactions of CBM with adjacent molecules.

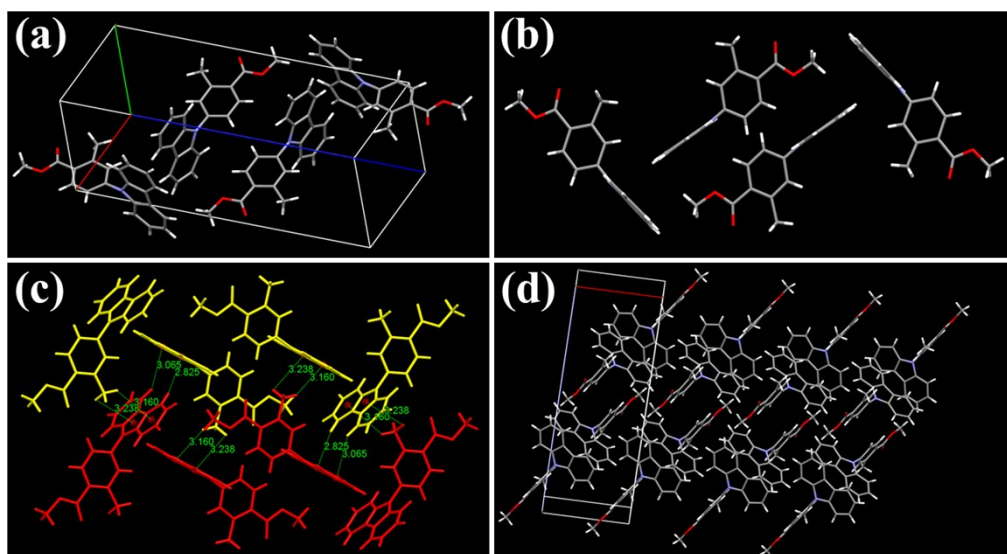

**Fig. S17** Unit cell and intermolecular interactions of CBM-CH<sub>3</sub> with adjacent molecules.

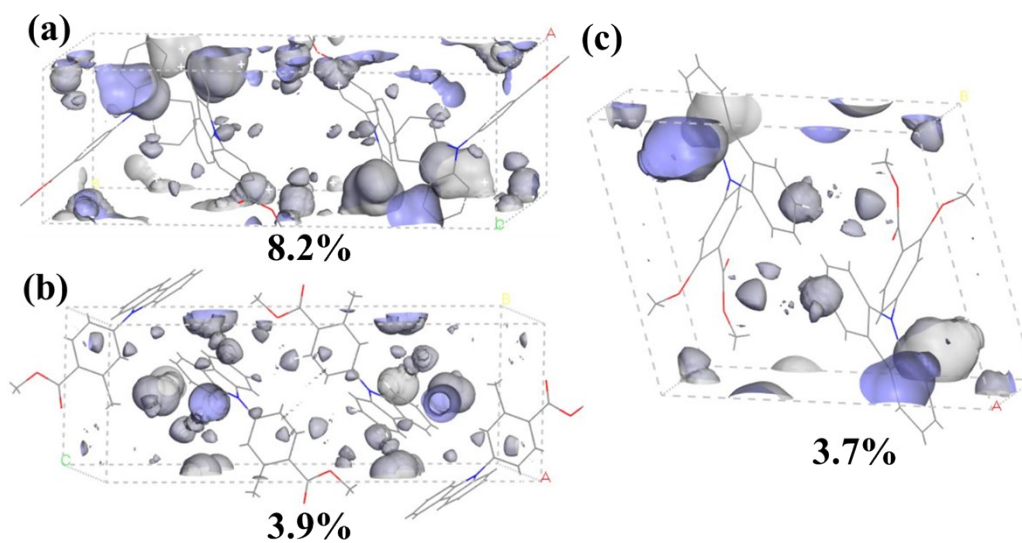

**Fig. S18** Free volume region of (a) CBM, (b) CBM-CH<sub>3</sub>, and (c) CBM-OCH<sub>3</sub> in single crystal cells.

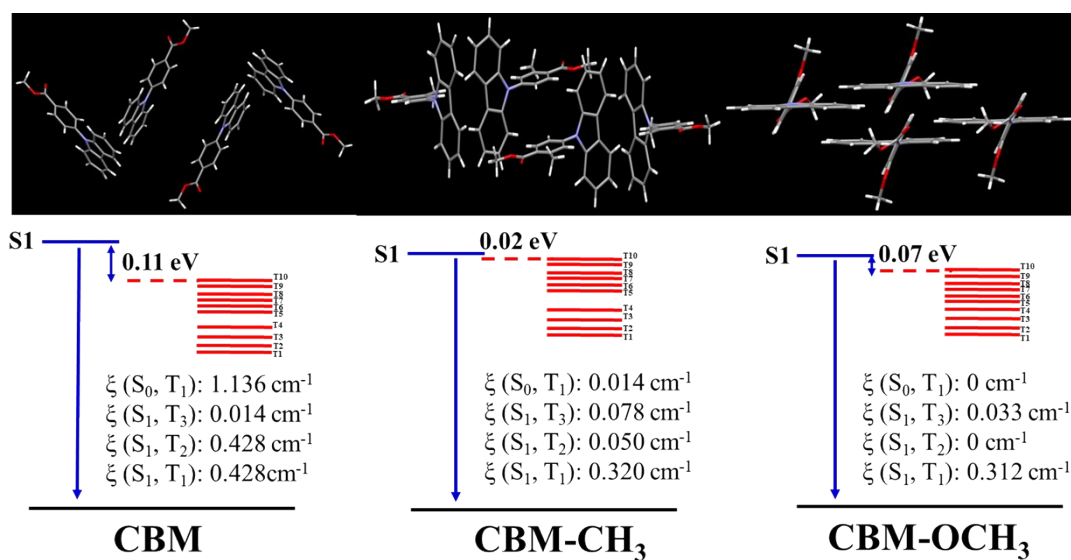

**Fig. S19** Molecular packing structure, the energy level diagram and SOC value for CBM, CBM-CH<sub>3</sub> and CBM-OCH<sub>3</sub> crystals, respectively.

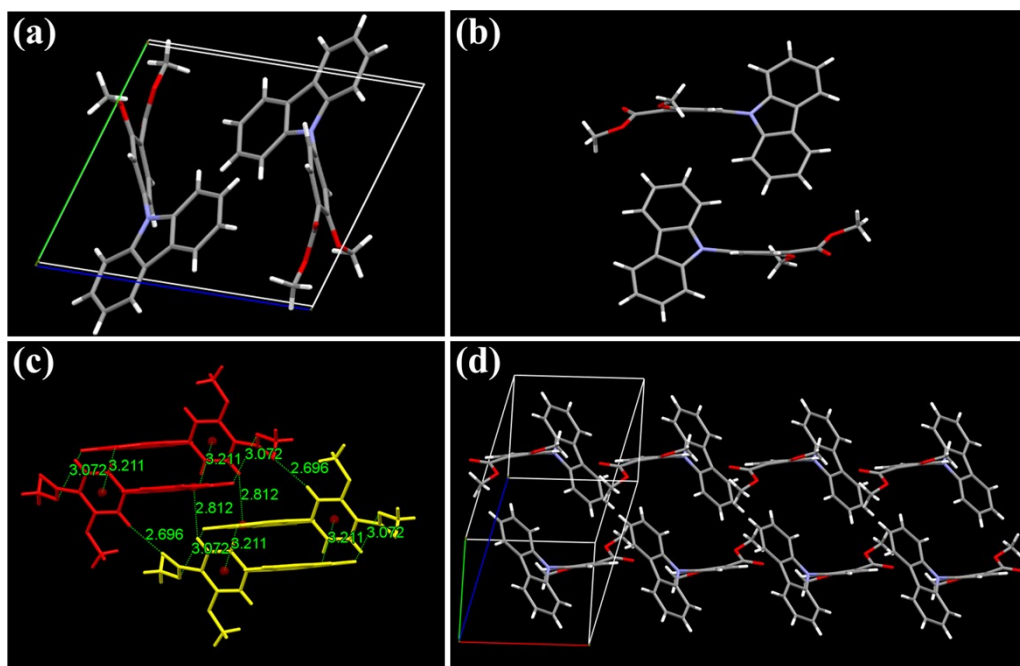

**Fig. S20** Unit cell and intermolecular interactions of CBM-OCH<sub>3</sub> with adjacent molecules.

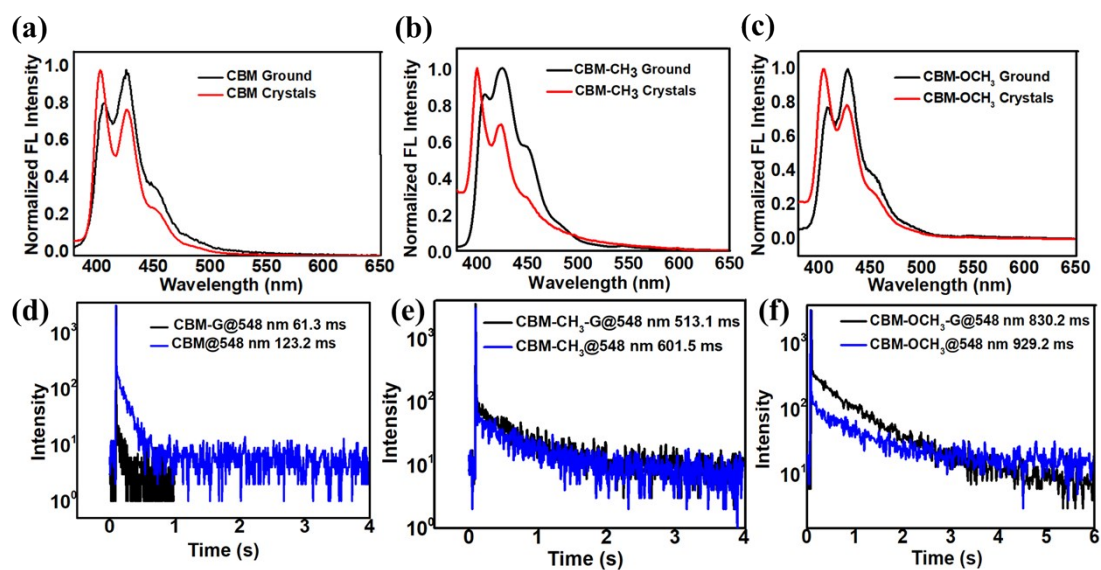

**Fig. S21** Fluorescent spectra and phosphorescence bands at 548 nm lifetime decay profiles of three carbazole-based crystals before (a: CBM, b: CBM-CH<sub>3</sub>, c: CBM-OCH<sub>3</sub>) and after heavily ground (d: CBM-G, e: CBM-CH<sub>3</sub>-G, f: CBM-OCH<sub>3</sub>-G).

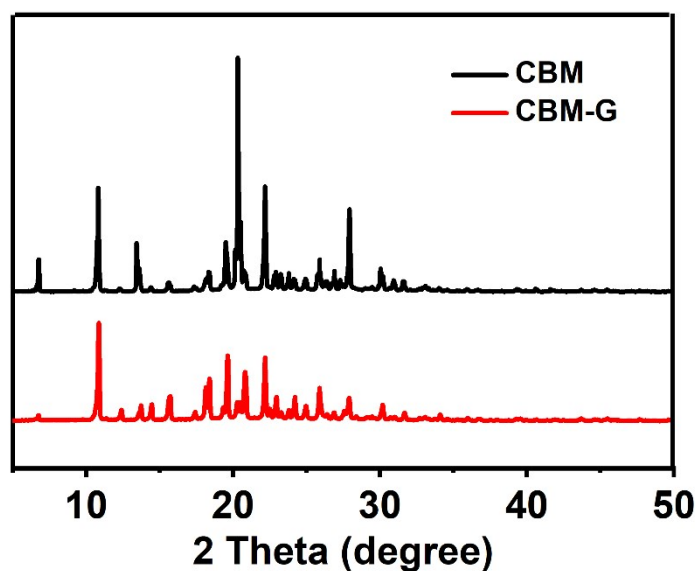

**Fig. S22** XRD pattern of crystalline and ground samples of CBM.

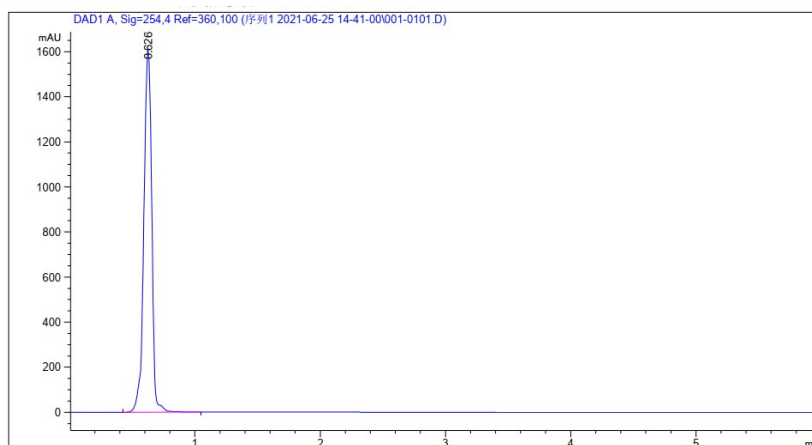

**Fig. S23** High performance liquid chromatography diagrams of CBM.

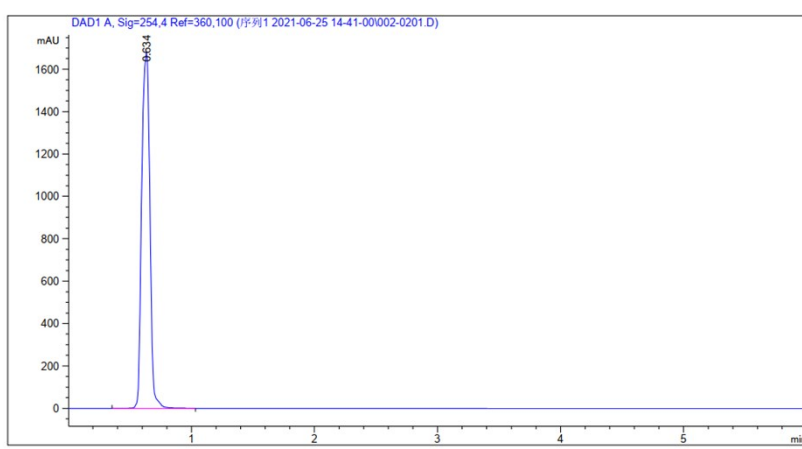

**Fig. S24** High performance liquid chromatography diagrams of CBM-CH<sub>3</sub>.

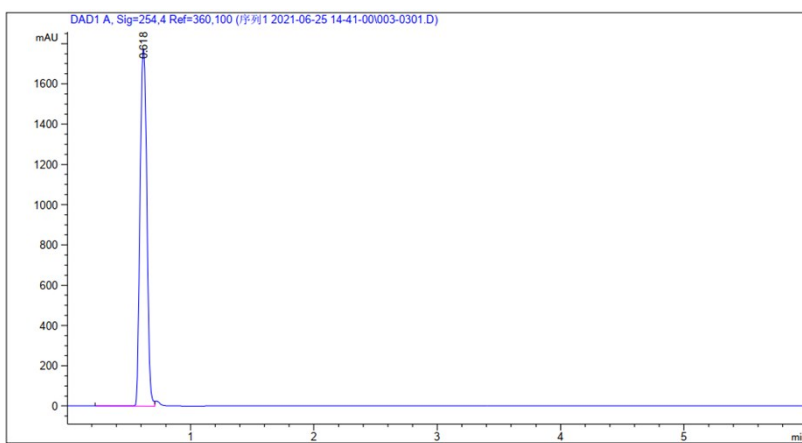

**Fig. S25** High performance liquid chromatography diagrams of CBM-OCH<sub>3</sub>.

**Table S1.** SOC matrix elements of CBM, CBM-CH<sub>3</sub> and CBM-OCH<sub>3</sub>

| SOC value       | CBM (cm <sup>-1</sup> ) | CBM-CH <sub>3</sub> (cm <sup>-1</sup> ) | CBM-OCH <sub>3</sub> (cm <sup>-1</sup> ) |
|-----------------|-------------------------|-----------------------------------------|------------------------------------------|
| $\xi(S_0, T_1)$ | 1.09                    | 0.102                                   | 0.270                                    |
| $\xi(S_1, T_1)$ | 0.188                   | 1.119                                   | 0.231                                    |
| $\xi(S_1, T_2)$ | 0.314                   | 0.033                                   | 0.734                                    |
| $\xi(S_1, T_3)$ | 0.606                   | 0.330                                   | 0.333                                    |

**Table S2.** Crystal data for CBM, CBM-CH<sub>3</sub> and CBM-OCH<sub>3</sub>.

| Identification code                        | CBM                                             | CBM-CH <sub>3</sub>                             | CBM-OCH <sub>3</sub>                            |
|--------------------------------------------|-------------------------------------------------|-------------------------------------------------|-------------------------------------------------|
| Empirical formula                          | C <sub>20</sub> H <sub>15</sub> NO <sub>2</sub> | C <sub>21</sub> H <sub>17</sub> NO <sub>2</sub> | C <sub>21</sub> H <sub>17</sub> NO <sub>3</sub> |
| Formula weight                             | 301.35                                          | 315.36                                          | 331.36                                          |
| Crystal system                             | monoclinic                                      | monoclinic                                      | triclinic                                       |
| Space group                                | P2 <sub>1</sub> /c                              | P2 <sub>1</sub> /n                              | P-1                                             |
| a / Å                                      | 8.1731(8)                                       | 8.6130(2)                                       | 7.9261(4)                                       |
| b / Å                                      | 25.846(9)                                       | 8.1005(2)                                       | 9.7507(6)                                       |
| c / Å                                      | 7.5022(17)                                      | 22.9376(6)                                      | 11.1901(5)                                      |
| $\alpha$ /°                                | 90                                              | 90                                              | 72.299(2)                                       |
| $\beta$ /°                                 | 103.436(2)                                      | 91.1990(10)                                     | 77.213(2)                                       |
| $\gamma$ /°                                | 90                                              | 90                                              | 86.046(2)                                       |
| Volume (Å <sup>3</sup> )                   | 1541.4(3)                                       | 1600.0(7)                                       | 803.45(7)                                       |
| Z                                          | 4                                               | 4                                               | 2                                               |
| $\rho_{\text{calc}}$ / mg mm <sup>-3</sup> | 1.299                                           | 1.309                                           | 1.370                                           |
| $\mu$ / mm <sup>-1</sup>                   | 0.084                                           | 0.084                                           | 0.092                                           |
| F(000)                                     | 632                                             | 664                                             | 348                                             |

## Reference

- [1] M. J. Frisch, G. W. Trucks, H. B. Schlegel, G. E. Scuseria, M. A. Robb, J. R. Cheeseman, G. Scalmani, V. Barone, B. Mennucci, G. A. Petersson, H. Nakatsuji, M. Caricato, X. Li, H. P. Hratchian, A. F. Izmaylov, J. Bloino, G. Zheng, J. L. Sonnenberg, M. Hada, M. Ehara, K. Toyota, R. Fukuda, J. Hasegawa, M. Ishida, T. Nakajima, Y. Honda, O. Kitao, H. Nakai, T. Vreven, J. A. Montgomery, Jr., J. E. Peralta, F. Ogliaro, M. Bearpark, J. J. Heyd, E. Brothers, K. N. Kudin, V. N. Staroverov, T. Keith, R. Kobayashi, J. Normand, K. Raghavachari, A. Rendell, J. C. Burant, S. S. Iyengar, J. Tomasi, M. Cossi, N. Rega, J. M. Millam, M. Klene, J. E. Knox, J. B. Cross, V. Bakken, C. Adamo, J. Jaramillo, R. Gomperts, R. E. Stratmann, O. Yazyev, A. J. Austin, R. Cammi, C. Pomelli, J. W. Ochterski, R. L. Martin, K. Morokuma, V. G. Zakrzewski, G. A. Voth, P. Salvador, J. J. Dannenberg, S. Dapprich, A. D. Daniels, O. Farkas, J. B. Foresman, J. V. Ortiz, J. Cioslowski, and D. J. Fox, Gaussian, Inc., Wallingford CT, 2013, Gaussian 09, Revision E.01.
- [2] Z. An, C. Zheng, Y. Tao, R. Chen, H. Shi, T. Chen, Z. Wang, H. Li, R. Deng, X. Liu, W. Huang, *Nat. Mater.*, 2015, **14**, 685.
- [3] T. Lu, F. Chen, *J. Comput. Chem.*, 2012, **33**, 580.
- [4] F. Weigend, R. Ahlrichs, *Phys. Chem. Chem. Phys.* 2005, **7**, 3297; F. Weigend, *Phys. Chem. Chem. Phys.* 2006, **8**, 1057; A. Hellweg, C. Hattig, S. Hofener, W. Klopper, *Theor. Chem. Acc.*, 2007, **117**, 587.
- [5] F. Weigend, *Phys. Chem. Chem. Phys.*, 2006, **8**, 1057.
- [6] A. Hellweg, C. Hattig, S. Hofener, W. Klopper, *Theor. Chem. Acc.*, 2007, **117**, 587.
- [7] Z. Mao, Z. Yang, Z. Fan, E. Ubba, W. Li, Y. Li, J. Zhao, Z. Yang, M. P. Aldred, Z. Chi, *Chem. Sci.*, 2019, **10**, 179.
- [8] Y. Xiong, Z. Zhao, W. Zhao, H. Ma, Q. Peng, Z. He, X. Zhang, Y. Chen, X. He, J. Lam, B. Z. Tang, *Angew. Chem. Int. Ed.*, 2018, **57**, 7997-8001.
- [9] Y. Xie, Y. Ge, Q. Peng, C. Li, Q. Li, Z. Li, *Adv. Mater.*, 2017, 1606829.
- [10] S. Cai, H. Shi, J. Li, L. Gu, Y. Ni, Z. Cheng, S. Wang, W. Xiong, L. Li, Z. An, W. Huang, *Adv. Mater.*, 2017, **29**, 1701244.
- [11] Y. Gong, G. Chen, Q. Peng, W. Z. Yuan, Y. Xie, S. Li, Y. Zhang, B. Z. Tang, *Adv.*

Mater., 2015, 27, 6195-6201.

[12] L. Xu, G. Li, T. Xu, W. Zhang, S. Zhang, S. Yin, Z. An, G. He, Chem. Commun., 2018, 54, 9226-9229.

[13] K. Zhang, Q. Sun, L. Tang, Y. Wang, X. Fan, L. Liu, S. Xue, W. Yang, J. Mater. Chem. C, 2018, 6, 8733-8737.

[14] Z. Yang, Z. Mao, X. Zhang, D. Ou, Y. Mu, Y. Zhang, C. Zhao, S. Liu, Z. Chi, J. Xu, Y. Wu, P. Lu, A. Lien, M. R. Bryce, Angew. Chem. Int. Ed. 2016, 55, 2181-2185.

[15] L. Gu, H. Shi, M. Gu, K. Ling, H. Ma, S. Cai, L. Song, C. Ma, H. Li, G. Xing, X. Hang, J. Li, W. Yao, Z. Shuai, Z. An, X. Liu, W. Huang, Angew. Chem. Int. Ed., 2018, 57, 8425-8431.

[16] Z. Mao, Z. Yang, Z. Fan, E. Ubba, W. Li, Y. Li, J. Zhao, Z. Yang, M. P. Aldred, Z. Chi, Chem. Sci., 2019, 10, 179-184.

[17] Y. Tao, R. Chen, H. Li, J. Yuan, Y. Wan, H. Jiang, C. Chen, Y. Si, C. Zheng, B. Yang, G. Xing, W. Huang, Adv. Mater., 2018, 30, 1803856.

[18] W. Zhao, T. S. Cheung, N. Jiang, W. Huang, J. Lam, X. Zhang, Z. He, B. Z. Tang, Nat. Commun., 2019, 10, 1595.

[19] H. Gao, Z. Gao, D. Jiao, J. Zhang, X. Li, Q. Tang, Y. Shi, D. Ding, Small, 2021, 2005449.
